# Supplementary material for: An evaluation of the implementation of cascade training for suicide prevention during the ‘Choose Life’ initiative in Scotland - utilizing Normalization Process Theory
Source: Springer Nature journal article supplement (doi:10.1186/s12913-019-4398-1), 2019-08-20
Supplement: MOESM1 [file 17086060]

The TIDieR (Template for Intervention Description and Replication) Checklist\*:

Information to include when describing an intervention and the location of the information

| Item number | Item                                                                                                                                                                                                                                                                                                                | Where located **                                                       |                             |
|-------------|---------------------------------------------------------------------------------------------------------------------------------------------------------------------------------------------------------------------------------------------------------------------------------------------------------------------|------------------------------------------------------------------------|-----------------------------|
|             |                                                                                                                                                                                                                                                                                                                     | Primary paper (page or appendix number)                                | Other † (details)           |
|             | An evaluation of cascade training for suicide prevention during the Choose Life initiative in Scotland                                                                                                                                                                                                              | Primary paper (page or appendix number)                                | Other † (details)           |
| 1.          | <b>BRIEF NAME</b><br>Provide the name or a phrase that describes the intervention.                                                                                                                                                                                                                                  | <u>STORM TTT</u>                                                       | _____                       |
| 2.          | <b>WHY</b><br>Describe any rationale, theory, or goal of the elements essential to the intervention.                                                                                                                                                                                                                | <u>P 2/3</u>                                                           | _____                       |
| 3.          | <b>WHAT</b><br>Materials: Describe any physical or informational materials used in the intervention, including those provided to participants or used in intervention delivery or in training of intervention providers.<br>Provide information on where the materials can be accessed (e.g. online appendix, URL). | <u>P3/4</u>                                                            | <u>not freely available</u> |
| 4.          | Procedures: Describe each of the procedures, activities, and/or processes used in the intervention, including any enabling or support activities.                                                                                                                                                                   | <u>P3/4</u>                                                            | _____                       |
| 5.          | <b>WHO PROVIDED</b><br>For each category of intervention provider (e.g. psychologist, nursing assistant), describe their expertise, background and any specific training given.                                                                                                                                     | Not available for<br><u>whole group (see table 2 for interviewees)</u> | _____                       |
| 6.          | <b>HOW</b><br>Describe the modes of delivery (e.g. face-to-face or by some other mechanism, such as internet or telephone) of the intervention and whether it was provided individually or in a group.                                                                                                              | <u>P3/4</u>                                                            | _____                       |
| 7.          | <b>WHERE</b><br>Describe the type(s) of location(s) where the intervention occurred, including any necessary infrastructure or relevant features.                                                                                                                                                                   | <u>P4</u>                                                              | _____                       |

|      |                                                                                                                                                                                   |     |  |
|------|-----------------------------------------------------------------------------------------------------------------------------------------------------------------------------------|-----|--|
|      | <b>WHEN and HOW MUCH</b>                                                                                                                                                          |     |  |
| 8.   | Describe the number of times the intervention was delivered and over what period of time including the number of sessions, their schedule, and their duration, intensity or dose. | P4  |  |
|      | <b>TAILORING</b>                                                                                                                                                                  |     |  |
| 9.   | If the intervention was planned to be personalised, titrated or adapted, then describe what, why, when, and how.                                                                  | P4  |  |
|      | <b>MODIFICATIONS</b>                                                                                                                                                              |     |  |
| 10.* | If the intervention was modified during the course of the study, describe the changes (what, why, when, and how).                                                                 | P4  |  |
|      | <b>HOW WELL</b>                                                                                                                                                                   |     |  |
| 11.  | Planned: If intervention adherence or fidelity was assessed, describe how and by whom, and if any strategies were used to maintain or improve fidelity, describe them.            | N/A |  |
| 12.* | Actual: If intervention adherence or fidelity was assessed, describe the extent to which the intervention was delivered as planned.                                               | N/A |  |

\*\* **Authors** - use N/A if an item is not applicable for the intervention being described. **Reviewers** – use ‘?’ if information about the element is not reported/not sufficiently reported.

† If the information is not provided in the primary paper, give details of where this information is available. This may include locations such as a published protocol or other published papers (provide citation details) or a website (provide the URL).

‡ If completing the TIDieR checklist for a protocol, these items are not relevant to the protocol and cannot be described until the study is complete.

\* We strongly recommend using this checklist in conjunction with the TIDieR guide (see *BMJ* 2014;348:g1687) which contains an explanation and elaboration for each item.

\* The focus of TIDieR is on reporting details of the intervention elements (and where relevant, comparison elements) of a study. Other elements and methodological features of studies are covered by other reporting statements and checklists and have not been duplicated as part of the TIDieR checklist. When a **randomised trial** is being reported, the TIDieR checklist should be used in conjunction with the CONSORT statement (see [www.consort-statement.org](http://www.consort-statement.org)) as an extension of **Item 5 of the CONSORT 2010 Statement**. When a **clinical trial protocol** is being reported, the TIDieR checklist should be used in conjunction with the SPIRIT statement as an extension of **Item 11 of the SPIRIT 2013 Statement** (see [www.spirit-statement.org](http://www.spirit-statement.org)). For alternate study designs, TIDieR can be used in conjunction with the appropriate checklist for that study design (see [www.equator-network.org](http://www.equator-network.org)).
